# Supplementary material for: Short and long-term clinical effectiveness and cost-effectiveness of a late-phase community-based balance and gait exercise program following hip fracture. The EVA-Hip Randomised Controlled Trial
Source: PubMed Central journal article supplement (PMC6860934; doi:10.1371/journal.pone.0224971), 2019-11-18
Supplement: pone.0224971.s002.pdf [file pone.0224971.s002.pdf]

**S2 Table. Results for estimated mean change. \*) P-values from non-parametric, Mann-Whitney U-tests, and means and CIs from bootstrapping, otherwise results from linear mixed models (LMMs) on original scale or backtransformed from LMMs on transformed scales.**

|                                       | Change from T1 to T2 |                |         |         |               |         | Change from T1 to T3 |               |         |         |                |         |
|---------------------------------------|----------------------|----------------|---------|---------|---------------|---------|----------------------|---------------|---------|---------|----------------|---------|
|                                       | Intervention         |                |         | Control |               |         | Intervention         |               |         | Control |                |         |
|                                       | Mean                 | 95% CI         | p-value | Mean    | 95% CI        | p-value | Mean                 | 95% CI        | p-value | Mean    | 95% CI         | p-value |
| Gait speed, preferred (m/sec)         | 0.13                 | (0.09,0.16)    | <0.001  | 0.03    | (0.00,0.07)   | 0.051   | 0.08                 | (0.05,0.12)   | <0.001  | 0.02    | (-0.02,0.05)   | 0.349   |
| Upright time (min/day)                | 4.82                 | (-13.91,24.61) | 0.614   | -13.66  | (-31.35,3.73) | 0.132   | -13.78               | (-31.8,4.58)  | 0.144   | -25.85  | (-43.85,-7.61) | 0.006   |
| Events (no./day)                      | 4.60                 | (1.10,8.20)    | 0.010   | -0.34   | (-3.64,2.96)  | 0.838   | -0.05                | (-3.44,3.38)  | 0.975   | -2.34   | (-5.67,1.04)   | 0.179   |
| Step Length (cm)                      | 4.84                 | (3.18,6.5)     | <0.001  | 0.99    | (-0.65,2.62)  | 0.236   | 4.71                 | (3.02,6.41)   | <0.001  | 1.00    | (-0.69,2.70)   | 0.247   |
| Cadence (steps/min)                   | 7.14                 | (4.36,9.93)    | <0.001  | 4.42    | (1.68,7.16)   | 0.002   | 4.96                 | (2.11,7.81)   | 0.001   | 3.83    | (0.99,6.68)    | 0.008   |
| Asymmetry (%)                         | -1.96                | (-3.73,-0.12)  | 0.036   | -0.54   | (-2.39,1.38)  | 0.571   | -3.20                | (-4.92,-1.41) | <0.001  | -1.79   | (-3.60,0.07)   | 0.062   |
| SPPB (0-12) *)                        | 1.6                  | (1.1,2.2)      | <0.001  | 0.2     | (-0.2,0.5)    | 0.397   | 1                    | (0.4,1.6)     | 0.003   | -0.1    | (-0.6,0.5)     | 0.621   |
| MMSE (0-30) *)                        | -0.4                 | (-1.2,0.4)     | 0.302   | -0.6    | (-1.3,0.1)    | 0.140   | -0.1                 | (-0.8,0.7)    | 0.697   | -1.4    | (-2.4,-0.6)    | 0.006   |
| CDR (sum of boxes, 0-18) *)           | 0.2                  | (-0.3,0.8)     | 0.374   | -0.2    | (-0.7,0.3)    | 0.661   | 0                    | (-0.5,0.5)    | 0.951   | 0       | (-0.5,0.4)     | 0.874   |
| Barthel Index (0-20) *)               | -0.1                 | (-0.5,0.2)     | 0.959   | 0       | (-0.6,0.4)    | 0.350   | 0                    | (-0.5,0.4)    | 0.922   | -0.2    | (-0.7,0.2)     | 0.515   |
| Nottingham E-ADL (0-66) *)            | 3.8                  | (1.8,6.1)      | 0.001   | 2.6     | (0.8,4.7)     | 0.014   | 1.3                  | (-2.1,4.1)    | 0.183   | 0.1     | (-2.3,2.3)     | 0.926   |
| GDS (Short Form, 0-15) *)             | 0.2                  | (-0.4,0.8)     | 0.607   | -0.5    | (-1.1,0.1)    | 0.138   | 0.3                  | (-0.2,0.9)    | 0.299   | 0.2     | (-0.5,0.9)     | 0.801   |
| Variability (SD) Step Length (cm)     | 0.14                 | (-0.14,0.43)   | 0.336   | 0.31    | (0.03,0.62)   | 0.034   | 0.5                  | (0.18,0.83)   | 0.002   | 0.62    | (0.29,0.98)    | <0.001  |
| Variability (SD) Base of support (cm) | 0.06                 | (-0.12,0.25)   | 0.526   | 0.05    | (-0.13,0.24)  | 0.580   | 0.06                 | (-0.13,0.26)  | 0.553   | 0.17    | (-0.03,0.38)   | 0.098   |
| EQ-5D-3L-Index *)                     | 0.03                 | (-0.03,0.08)   | 0.059   | 0.04    | (-0.03,0.10)  | 0.156   | -0.03                | (-0.10,0.02)  | 0.717   | -0.03   | (-0.13,0.05)   | 0.732   |
| Short FES-I (0-7) *)                  | -0.8                 | (-1.7,0.1)     | 0.042   | -0.6    | (-1.2,0.1)    | 0.061   | -0.8                 | (-2,0.2)      | 0.202   | -0.9    | (-1.7,-0.3)    | 0.023   |
| Chalder Fatigue Scale (0-33) *)       | -1                   | (-1.8,-0.1)    | 0.021   | 0       | (-0.8,0.8)    | 0.706   | -0.2                 | (-1.5,0.8)    | 0.803   | 0.7     | (-0.2,1.7)     | 0.271   |
