# Supplementary material for: Short and long-term clinical effectiveness and cost-effectiveness of a late-phase community-based balance and gait exercise program following hip fracture. The EVA-Hip Randomised Controlled Trial
Source: PubMed Central journal article supplement (PMC6860934; doi:10.1371/journal.pone.0224971), 2019-11-18
Supplement: pone.0224971.s005.pdf [file pone.0224971.s005.pdf]

**S5 Table. Unit costs in 2012 EUR.**

| Services type                       | Type of unit | Unit cost (EUR) | Source of information                                                     |
|-------------------------------------|--------------|-----------------|---------------------------------------------------------------------------|
| <b>Physiotherapy</b>                |              |                 |                                                                           |
| Physical therapist - municipality   | Hours        | 101             | Municipality of Trondheim                                                 |
| Physical therapist - private        | Hours        | *               | The Norwegian Health Economics Administration (Helfo)                     |
| <b>Home based services</b>          |              |                 |                                                                           |
| Occupational therapist              | Hours        | 96              | Municipality of Trondheim                                                 |
| Long term stay                      | Days         | 302             | Municipality of Trondheim                                                 |
| Ambulatory follow-up                | Hours        | 94              | Municipality of Trondheim                                                 |
| Home nursing care                   | Hours        | 97              | Municipality of Trondheim                                                 |
| Home care services                  | Hours        | 95              | Municipality of Trondheim                                                 |
| Safety alarm                        | Months       | 5               | Municipality of Trondheim                                                 |
| Meals on wheels                     | Months       | 21              | Municipality of Trondheim                                                 |
| Visits to daycentre                 | Months       | 666             | Municipality of Trondheim                                                 |
| <b>Nursing home</b>                 |              |                 |                                                                           |
| Short term stay - rehabilitation    | Days         | 385             | Municipality of Trondheim                                                 |
| Short term stay                     | Days         | 321             | Municipality of Trondheim                                                 |
| Day based rehabilitation            | Days         | 196             | Municipality of Trondheim                                                 |
| <b>General practitioner</b>         | Visits       | *               | The Norwegian Health Economics Administration (Helfo)                     |
| <b>Hospital services</b>            |              |                 |                                                                           |
| Inpatient stay - somatic ward       | Days         | 1291            | St Olavs hospital, from local cost-per-patient system                     |
| Inpatient stay - psychiatric ward   | Days         | 1168            | Norwegian Directorate of Health, average cost per diem St Olavs hospital. |
| Outpatient visit - somatic ward     | Visits       | 245             | St Olavs hospital, from local cost-per-patient system                     |
| Outpatient visit - psychiatric ward | Visits       | 343             | Norwegian Directorate of Health, average cost per diem St Olavs hospital. |

\*Costs calculated from fee-for-service information from Helfo.
