# Supplementary material for: Short and long-term clinical effectiveness and cost-effectiveness of a late-phase community-based balance and gait exercise program following hip fracture. The EVA-Hip Randomised Controlled Trial
Source: PubMed Central journal article supplement (PMC6860934; doi:10.1371/journal.pone.0224971), 2019-11-18
Supplement: pone.0224971.s007.pdf [file pone.0224971.s007.pdf]

**S7 Table. Health and care costs per patient. (2012 EUR, n=143).**

|                                          | Period T1 to T2 |       |         |       | Period T1 to T3 |       |         |       |
|------------------------------------------|-----------------|-------|---------|-------|-----------------|-------|---------|-------|
|                                          | Intervention    |       | Control |       | Intervention    |       | Control |       |
|                                          | Mean            | SD    | Mean    | SD    | Mean            | SD    | Mean    | SD    |
| <b>Physiotherapy*)</b>                   | 2239            | 1231  | 596     | 728   | 2721            | 1404  | 955     | 1206  |
| Primary care                             |                 |       |         |       |                 |       |         |       |
| <b>Home based services**)</b>            | 2813            | 3758  | 2267    | 3379  | 7454            | 9788  | 6103    | 9187  |
| <b>Nursing home***)</b>                  | 4010            | 8754  | 5078    | 10387 | 10501           | 20817 | 13724   | 25451 |
| <b>General Practitioner</b>              | 227             | 231   | 247     | 284   | 550             | 469   | 658     | 675   |
| Hospital services                        |                 |       |         |       |                 |       |         |       |
| <b>Sum inpatient and outpatient****)</b> | 2116            | 11431 | 2500    | 8909  | 4993            | 13331 | 4537    | 10290 |
| <b>TOTAL costs</b>                       | 11406           | 13765 | 10687   | 13417 | 26219           | 25468 | 25976   | 28631 |

\*) Includes physical therapist municipality and physical therapist private

\*\*) Includes occupational therapist, day based rehabilitation, ambulatory follow-up, home nursing care, home care services, safety alarm, meals on wheels, day centre

\*\*\*) Include long term stay, short term stay, rehabilitation stay

\*\*\*\*) Includes hospital inpatient stay somatic ward, inpatient stay psychiatric ward, outpatient visit somatic ward and outpatient visit psychiatric ward
